# Supplementary material for: The Development and Application of a HPTLC-Derived Database for the Identification of Phenolics in Honey
Source: MDPI journal article supplement (doi:10.3390/molecules27196651), 2022-10-06
Supplement: s1 [file s1]

## Standards Used in the Database Development

In summary, 107 standards, 102 of which were phenolic in nature, were utilised in the database development (Supplementary Material, Tables 1-4). Thirty-five of the standards were flavonoids, 9 of which were from the flavone sub-class, 8 were flavonols, 6 were flavanones, 2 were flavanonols, 4 were flavan-3-ols, 5 were flavones and one was a chalcone. Forty-one standards could be classified as simple phenolic, 25 of which belonged to the hydroxybenzoic acid and derivatives (HBAD) subclass, while 16 belonged to the hydroxycinnamic acid and derivatives (HCAD) subclass. Twenty-seven standards were other/miscellaneous phenolics, 6 of which belonged to the hydroxyphenylacetic acid and derivatives (HPAAD) subclass, 3 to hydroxyphenyllactic acid and derivatives (HPLAD), 2 to hydroxyphenylpropanoic acid and derivatives (HPPAD), 2 were alkylmethoxyphenols (AMPh), 3 were alkylphenols (APh), 1 was an aminophenol, two were simple phenols, 4 were hydroxybenzaldehydes (HBzd), 2 were hydroxyacetophenones (HAPh) and 1 was an oxalate ester. There were also four non phenolic compounds that were used in the study.

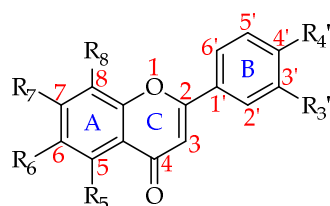

Supplementary Figure S1: Basic Flavone Structure (See 1-9 in **Supplementary Table S1**)

Supplementary Table S1: Flavones Standards Used in the Database Development (See **Supplementary Figure S1** for general structure)

| R5   | R6     | R7     | R8   | R3'  | R4'   | Code | Name                      | CAS No.    | Supplier | Concentration (mg/mL) & Injection Volume (μL) |
|------|--------|--------|------|------|-------|------|---------------------------|------------|----------|-----------------------------------------------|
| -O-H | -H     | -H     | -H   | -H   | -H    | 1    | 5-Methoxyflavone          | 42079-78-7 | A        | 0.5, 5                                        |
| -H   | -O-Glc | -H     | -H   | -H   | -H    | 2    | 6-Hydroxy-flavone-β-D-Glc | 906-33-2   | A        | 0.5, 5                                        |
| -O-H | -H     | -O-Me  | -H   | -H   | -O-Me | 3    | Acacetin                  | 480-44-4   | B        | 0.5, 5                                        |
| -O-H | -H     | -O-H   | -H   | -H   | -O-H  | 4    | Apigenin                  | 520-36-5   | C        | 0.5, 5                                        |
| -O-H | -H     | -O-Glc | -H   | -H   | -H    | 5    | Baicalin                  | 21967-41-9 | C        | 1.0, 5                                        |
| -O-H | -H     | -O-H   | -H   | -H   | -H    | 6    | Chrysin                   | 480-40-0   | C        | 0.5, 5                                        |
| -O-H | -H     | -O-Me  | -H   | -H   | -O-H  | 7    | Genkwanin                 | 437-64-9   | B        | 0.5, 5                                        |
| -O-H | -H     | -O-H   | -H   | -O-H | -O-H  | 8    | Luteolin                  | 491-70-3   | C        | 0.5, 5                                        |
| -O-H | -H     | -O-H   | -Glc | -H   | -O-H  | 9    | Vitexin                   | 3681-93-4  | B        | 0.5, 5                                        |

Legend: -H – hydride, -O-H – hydroxide, -O-Me – Methoxide, - Glc – glucoside, Suppliers: A=Sigma Aldrich (Castle Hill, NSW, Australia), B=Angene International Ltd. (Nanjing, China), C=Combi-Blocks Inc., (San Diego, CA, USA)

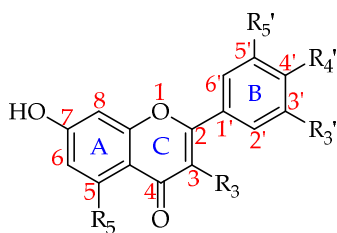

Supplementary Figure S2: Basic Flavonol Structure (see 10-17 in **Supplementary Table S2**)

Supplementary Table S2: Flavonol Standards Used in the Database Development (See **Supplementary Figure S2** for general structure)

| R3     | R5   | R3'   | R4'   | R5'  | Code      | Name         | CAS No.  | Supplier | Concentration (mg/mL) & Injection Volume (μL) |
|--------|------|-------|-------|------|-----------|--------------|----------|----------|-----------------------------------------------|
| -O-H   | -H   | -O-H  | -O-H  | -H   | <b>10</b> | Fisetin      | 528-48-3 | B        | 0.5, 5                                        |
| -O-H   | -O-H | -H    | -H    | -H   | <b>11</b> | Galangin     | 548-83-4 | D        | 0.5, 5                                        |
| -O-H   | -O-H | -O-Me | -O-H  | -H   | <b>12</b> | Isorhamnetin | 480-19-3 | D        | 0.5, 5                                        |
| -O-H   | -O-H | -H    | -O-Me | -H   | <b>13</b> | Kaempferide  | 491-54-3 | B        | 0.5, 5                                        |
| -O-H   | -O-H | -H    | -O-H  | -H   | <b>14</b> | Kaempferol   | 520-18-3 | C        | 0.5, 5                                        |
| -O-H   | -O-H | -O-H  | -O-H  | -O-H | <b>15</b> | Myricetin    | 529-44-2 | C        | 0.5, 5                                        |
| -O-H   | -O-H | -O-H  | -O-H  | -H   | <b>16</b> | Quercetin    | 117-39-5 | E        | 0.5, 5                                        |
| -O-Rut | -O-H | -O-H  | -O-H  | -H   | <b>17</b> | Rutin        | 153-18-4 | C        | 0.5, 5                                        |

Legend: -H – hydride, -O-H – hydroxide, -O-Me – Methoxide, -O-Rut – rutoside, Suppliers: B=Angene International Ltd. (Nanjing, China), C=Combi-Blocks Inc., (San Diego, CA, USA), D= Wuhan ChemFaces Biochemical Co., Ltd. (Wuhan, Hubei, China), E= Alfa Aesar (Lancashire, UK)

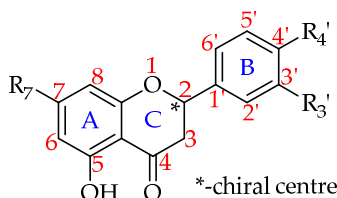

Supplementary Figure S3: Basic Flavanone Structure (see 18-23 in **Supplementary Table S3**)

Supplementary Table S3: Flavanone Standards Used in the Database Development (See **Supplementary Figure S3** for general structure)

| R7     | R3'  | R4'   | Code      | Name       | CAS No.    | Supplier | Concentration (mg/mL) & Injection Volume (μL) |
|--------|------|-------|-----------|------------|------------|----------|-----------------------------------------------|
| -O-H   | -O-H | -O-Me | <b>18</b> | Hesperitin | 520-33-2   | C        | 0.5, 5                                        |
| -O-Rut | -O-H | -O-Me | <b>19</b> | Hesperidin | 520-26-3   | C        | 0.5, 5                                        |
| -O-H   | -H   | -O-H  | <b>20</b> | Naringenin | 67604-48-2 | C        | 0.5, 5                                        |
| -O-Rut | -H   | -O-H  | <b>21</b> | Naringin   | 10236-47-2 | F        | 1.0, 5                                        |

|       |    |      |           |             |           |   |        |
|-------|----|------|-----------|-------------|-----------|---|--------|
| -O-H  | -H | -H   | <b>22</b> | Pinocembrin | 480-39-7  | D | 0.5, 5 |
| -O-Me | -H | -O-H | <b>23</b> | Sakuranetin | 2957-21-3 | B | 0.5, 5 |

Legend: -H – hydride, -O-H – hydroxide, -O-Me – Methoxide, -O-Rut – rutoside, Suppliers: B=Angene International Ltd. (Nanjing, China), C=Combi-Blocks Inc., (San Diego,CA, USA), D= Wuhan ChemFaces Biochemical Co., Ltd. (Wuhan, Hubei, China), F=AK Scientific, Inc. (CA, USA)

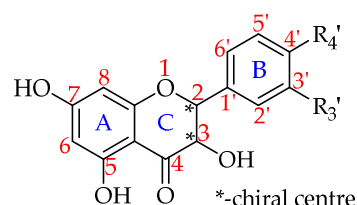

Supplementary Figure S4: Basic Flavanone Structure (see 24-25 in **Supplementary Table S4**)

Supplementary Table S4: Flavanone Standards Used in the Database Development (See **Supplementary Figure S4** for general structure)

| R3'  | R4'  | Code      | Name        | CAS No.  | Supplier | Concentration (mg/mL) & Injection Volume (μL) |
|------|------|-----------|-------------|----------|----------|-----------------------------------------------|
| -H   | -H   | <b>24</b> | Pinobanksin | 548-82-3 | B        | 0.5, 5                                        |
| -O-H | -O-H | <b>25</b> | Taxifolin   | 480-18-2 | F        | 0.1, 0.5                                      |

Legend: -H – hydride, -O-H – hydroxide, Suppliers: B=Angene International Ltd. (Nanjing, China), F=AK Scientific, Inc. (CA, USA)

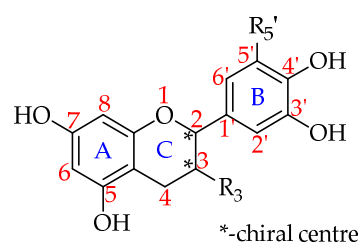

Supplementary Figure S5: Basic Flavan-3-ol Structure (see 26-29 in **Supplementary Table S5**)

Supplementary Table S5: Flavan-3-ol Standards Used in the Database Development (See **Supplementary Figure S5** for general structure)

| R3      | R5'  | Code      | CAS No.  | Name                     | Supplier | Concentration (mg/mL) & Injection Volume (μL) |
|---------|------|-----------|----------|--------------------------|----------|-----------------------------------------------|
| -O-H    | -H   | <b>26</b> | 154-23-4 | Catechin                 | B        | 0.5, 5                                        |
| -O-H    | -H   | <b>27</b> | 490-46-0 | Epicatechin              | D        | 0.5, 5                                        |
| -O-H    | -O-H | <b>28</b> | 970-74-1 | Epigallocatechin         | C        | 0.5, 5                                        |
| -O-Gall | -O-H | <b>29</b> | 989-51-5 | Epigallocatechin gallate | B        | 0.5, 5                                        |

Legend: -H – hydride, -O-H – hydroxide, -O-Gall-Gallate; Suppliers: B=Angene International Ltd. (Nanjing, China), C=Combi-Blocks Inc., (San Diego,CA, USA), D= Wuhan ChemFaces Biochemical Co., Ltd. (Wuhan, Hubei, China)

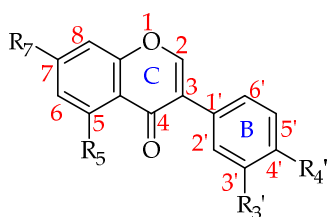

Supplementary Figure S6. Basic Isoflavonoid Structure (see 30-34 in **Supplementary Table S6**)

Supplementary Table S6: Isoflavonoid Standards used in the Database Development (See **Supplementary Figure S6** for general structure)

| R5   | R7     | R3'  | R4'   | Code | Name         | CAS No.  | Supplier | Concentration (mg/mL) & Injection Volume (μL) |
|------|--------|------|-------|------|--------------|----------|----------|-----------------------------------------------|
| -O-H | -O-H   | -H   | -O-Me | 30   | Biochanin A  | 491-80-5 | A        | 0.5, 5                                        |
| -H   | -O-H   | -O-H | -H    | 31   | Daidzein     | 486-66-8 | A        | 0.25, 5                                       |
| -H   | -O-H   | -H   | -O-Me | 32   | Formononetin | 485-72-3 | B        | 0.5, 5                                        |
| -O-H | -O-H   | -H   | -O-H  | 33   | Genistein    | 446-72-0 | C        | 0.5, 5                                        |
| -O-H | -O-Glc | -H   | -O-H  | 34   | Genistin     | 529-59-9 | B        | 0.5, 5                                        |

Legend: -H – hydride, -O-H – hydroxide, -O-Me – Methoxide, -O-Glc – glucoside, Suppliers : A= Sigma Aldrich (Castle Hill, NSW, Australia), B=Angene International Ltd. (Nanjing, China), C=Combi-Blocks Inc., (San Diego,CA, USA)

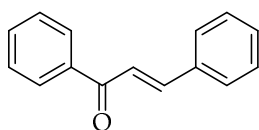

Supplementary Figure S7. Chalcone (see 35 in **Supplementary Table S7**)

Supplementary Table S7: t-Chalcone Standard Used in the Database Development (See **Supplementary Figure S7** for structure)

| Code | Name     | CAS No.  | Supplier | Concentration (mg/mL) & Injection Volume (μL) |
|------|----------|----------|----------|-----------------------------------------------|
| 35   | Chalcone | 614-47-1 | A        | 0.5, 5                                        |

Legend: Supplier: A= Sigma Aldrich (Castle Hill, NSW, Australia)

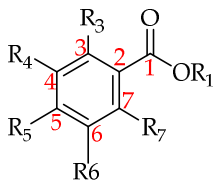

Supplementary Figure S8: Hydroxybenzoic Acid and its Derivatives (HBADs) (see 36-60 in **Supplementary Table S8**)

Supplementary Table S8: Hydroxybenzoic Acid and its Derivatives (HBADs) Standards used in the Database Development (See **Supplementary Figure S8** for general structure)

| OR1          | R3    | R4    | R5         | R     | Code | Name                         | CAS No.   | Supplier | Concentration (mg/mL) & Injection Volume (μL) |
|--------------|-------|-------|------------|-------|------|------------------------------|-----------|----------|-----------------------------------------------|
| -H           | -O-H  | -O-H  | -O-H       | -H    | 36   | 2,3,4 Trihydrobenzoic acid   | 610-02-6  | B        | 0.5, 5                                        |
| -H           | -O-Me | -O-Me | -O-Me      | -H    | 37   | 2,3,4-TrimethoxyBenzoic acid | 573-11-5  | A        | 0.5, 5                                        |
| -H           | -O-Me | -H    | -O-Me      | -O-Me | 38   | 2,4,5-TrimethoxyBenzoic Acid | 490-64-2  | A        | 0.5, 5                                        |
| -H           | -O-H  | -H    | -O-H       | -H    | 39   | 3,5-Dihydroxybenzoic acid    | 99-10-5   | A        | 0.5, 5                                        |
| -H           | -H    | -H    | -H         | -H    | 40   | Benzoic acid                 | 65-85-0   | G        | 2, 5                                          |
| -H           | -H    | -H    | -Isopropyl | -H    | 41   | Cuminic acid                 | 536-66-3  | F        | 1, 5                                          |
| See Figure 9 |       |       |            |       | 42   | Ellagic acid                 | 476-66-4  | H        | 0.5, 20                                       |
| -H           | -H    | -O-Me | -O-Me      | -O-Me | 43   | Eudesmic acid                | 118-41-2  | C        | 1, 5                                          |
| -H           | -H    | -O-H  | -O-H       | -O-H  | 44   | Gallic Acid                  | 149-91-7  | I        | 0.5, 5                                        |
| -H           | -O-H  | -H    | -H         | -O-H  | 45   | Gentisic acid                | 490-79-9  | C        | 0.5, 10                                       |
| -Me          | -H    | -O-Me | -O-gent    | -O-Me | 46   | Leptosperin                  | N.I       | J        | 0.5, 5                                        |
| -Me          | -H    | -H    | -O-H       | -H    | 47   | Methyl paraben               | 99-76-3   | C        | 1, 5                                          |
| -Me          | -H    | -O-Me | -O-H       | -O-Me | 48   | Methyl syringate             | 884-35-5  | C        | 0.5, 5                                        |
| -Me          | -H    | -O-Me | -O-Me      | -O-Me | 49   | Methyl-3,4,5-TMBe            | 1916-07-0 | H        | 1, 5                                          |
| -H           | -H    | -O-H  | -H         | -H    | 50   | m-hydroxybenzoic acid        | 99-06-9   | C        | 1, 5                                          |
| -H           | -H    | -Me   | -H         | -H    | 51   | m-Toluic Acid                | 99-04-7   | A        | 0.5, 5                                        |
| -H           | -O-Me | -H    | -H         | -H    | 52   | o-Anisic acid                | 579-75-9  | A        | 0.5, 5                                        |
| -H           | -Me   | -H    | -H         | -H    | 53   | o-Toluic Acid                | 118-90-1  | A        | 0.5, 3                                        |
| -H           | -H    | -O-H  | -O-H       | -H    | 54   | Protocatechuic acid          | 99-50-3   | C        | 0.5, 5                                        |
| -H           | -H    | -H    | -O-H       | -H    | 55   | p-Hydroxybenzoic acid        | 99-96-7   | C        | 0.5, 5                                        |
| -H           | -O-H  | -O-H  | -H         | -H    | 56   | Resorcylic acid              | 303-38-8  | C        | 1, 5                                          |
| -H           | -O-H  | -H    | -H         | -H    | 57   | Salicylic acid               | 69-72-7   | G        | 2, 5                                          |
| -H           | -H    | -O-Me | -O-H       | -O-Me | 58   | Syringic acid                | 530-57-4  | C        | 0.5, 5                                        |
| -H           | -H    | -O-Me | -O-H       | -H    | 59   | Vanillic acid                | 121-34-6  | C        | 0.5, 5                                        |
| -Me          | -H    | -O-Me | -O-H       | -H    | 60   | Vanillic acid methyl ester   | 3943-74-6 | C        | 0.5, 5                                        |

Legend: -H – hydride, -O-H – hydroxide, -O-Me – Methoxide, -Me – methyl, -O-Gent – gentibioside, TMBe – trimethoxybenzoate, Suppliers : A= Sigma Aldrich (Castle Hill, NSW, Australia), B=Angene International Ltd. (Nanjing, China), C=Combi-Blocks Inc., (San Diego,CA, USA), F= AK Scientific, Inc. (CA, USA), G= Chem Supply Australia Pty Ltd (Port Adelaide, SA, Australia), H=Sigma-Aldrich (St. Louis, MO, USA), I= Ajax Finechem Pvt. Ltd., (Sydney, Australia), J=Kindly donated by Dr Jonathan Stephens (Auckland University, New Zealand)

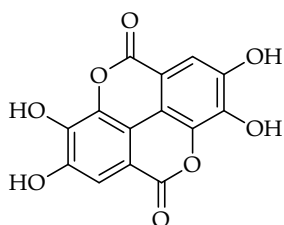

Supplementary Figure S9: Ellagic Acid (42)

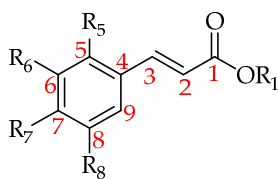

Supplementary Figure S10: Hydroxycinnamic Acid and its Derivatives (HCADs) (see **61-76** in **Supplementary Table S9**)

Supplementary Table S9: Hydroxycinnamic Acid and its Derivatives (HCADs) Standards used in the Database Development (See **Supplementary Figure S10** for general structure)

| OR1        | R5   | R6    | R7    | R8  | Code Name                        | CAS No.     | Supplier | Concentration (mg/mL) & Injection Volume (μL) |
|------------|------|-------|-------|-----|----------------------------------|-------------|----------|-----------------------------------------------|
| -H         | -H   | -O-Me | -O-Me | -H  | <b>61</b> 3,4-DMCA               | 2316-26-9   | C        | 1, 5                                          |
| -H         | -H   | -O-H  | -O-H  | -H  | <b>62</b> Caffeic acid           | 331-39-5    | C        | 0.5, 5                                        |
| -phenyl    | -H   | -O-H  | -O-H  | -H  | <b>63</b> CAPE                   | 104594-70-9 | A        | 0.5, 5                                        |
| -QA (3)    | -H   | -O-H  | -O-H  | -H  | <b>64</b> Chlorogenic acid       | 327-97-9    | C        | 0.5, 5                                        |
| -H         | -H   | -O-Me | -O-H  | -H  | <b>65</b> Ferulic acid           | 537-98-4    | C        | 0.5, 5                                        |
| -H         | -H   | -O-H  | -O-Me | -H  | <b>66</b> Isoferulic acid        | 537-73-5    | F        | 1, 5                                          |
| -H         | -H   | -O-H  | -H    | -H  | <b>67</b> m-Coumaric acid        | 14755-02-3  | C        | 1.7, 5                                        |
| -Me        | -H   | -O-Me | -O-H  | -H  | <b>68</b> Methyl ferulate        | 2309-07-1   | C        | 1, 5                                          |
| -QA (3)    | -H   | -O-H  | -O-H  | -H  | <b>69</b> Neochlorogenic Acid    | 906-33-2    | A        | 0.5, 5                                        |
| -H         | -O-H | -H    | -H    | -H  | <b>70</b> o-Coumaric acid        | 614-60-8    | C        | 0.5, 5                                        |
| -H         | -H   | -H    | -O-H  | -H  | <b>71</b> p-Coumaric acid        | 501-98-4    | C        | 0.5, 5                                        |
| -H         | -H   | -H    | -O-Me | -H  | <b>72</b> p-Methoxycinnamic acid | 830-09-1    | A        | 0.5, 5                                        |
| -3,4-DHPLA | -H   | -O-H  | -O-H  | -H  | <b>73</b> Rosmarinic acid        | 20283-92-5  | C        | 0.5, 5                                        |
| -H         | -H   | -O-Me | -O-H  | -Me | <b>74</b> Sinapic acid           | 530-59-6    | C        | 0.5, 5                                        |
| -H         | -H   | -H    | -H    | -H  | <b>75</b> t-Cinnamic acid        | 140-10-3    | C        | 0.5, 5                                        |
| -Me        | -H   | -H    | -O-H  | -H  | <b>76</b> t-p-CAME               | 19367-38-5  | B        | 0.5, 5                                        |

Legend: -H – hydride, -O-H – hydroxide, -O-Me – Methoxide, -Me – methyl, QA=quinic acid, DMCA – Dimethoxycinnamic acid, CAPE – Caffeic acid phenethyl ester, t-p-CAME – Coumaric acid methyl ester, Suppliers: A= Sigma Aldrich (Castle Hill, NSW, Australia), B=Angene International Ltd. (Nanjing, China), C=Combi-Blocks Inc., (San Diego, CA, USA), F= AK Scientific, Inc. (CA, USA)

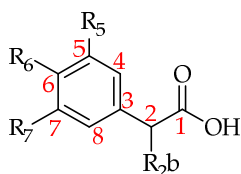

Supplementary Figure S11: Hydroxyphenylacetic Acid and Derivatives (HPAAD) (see **77-82** in **Supplementary Table S10**)

Supplementary Table S10: Hydroxyphenylacetic Acid and Derivatives (HPAAD) Standards used in the Database Development (See **Figure S11** for general structure)

| R2b  | R5    | R6   | R7   | Code | Name                           | CAS No.  | Supplier | Concentration (mg/mL) & Injection Volume (μL) |
|------|-------|------|------|------|--------------------------------|----------|----------|-----------------------------------------------|
| -H   | -H    | -O-H | -O-H | 77   | 3,4-Dihydroxyphenylacetic acid | 102-32-9 | A        | 0.5, 5                                        |
| -H   | -O-H  | -H   | -O-H | 78   | Homogentisic acid              | 451-13-8 | D        | 0.5, 5                                        |
| -H   | -O-Me | -O-H | -H   | 79   | Homovanillic acid              | 306-08-1 | C        | 1, 5                                          |
| -O-H | -H    | -H   | -H   | 80   | Mandelic acid                  | 90-64-2  | A        | 0.5, 10                                       |
| -H   | -H    | -H   | -H   | 81   | Phenylacetic acid              | 103-82-2 | K        | 2, 5                                          |
| -H   | -H    | -O-H | -H   | 82   | p-Hydroxyphenylacetic acid     | 156-38-7 | A        | 0.5, 20                                       |

Legend: -H – hydride, -O-H – hydroxide, -O-Me – Methoxide, -Me – methyl, Suppliers: A= Sigma Aldrich (Castle Hill, NSW, Australia), C= Combi-Blocks Inc., (San Diego,CA, USA), D= Wuhan ChemFaces Biochemical Co., Ltd. (Wuhan, Hubei, China), K= Fluka AG (Buchs, Sankt Gallen, Switzerland)

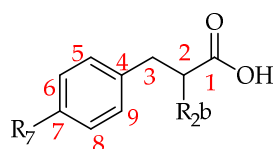

Supplementary Figure S12: Hydroxyphenyllactic Acid and Derivatives (HPLAD) (see **83-85** in **Supplementary Table S11**) and Hydroxyphenylpropanoic Acid and Derivatives (HPPAD) (see **86-87** in **Supplementary Table S11**)

Supplementary Table S11: Hydroxyphenyllactic Acid and Derivatives (HPLAD) and Hydroxyphenylpropanoic Acid and Derivatives (HPPAD) Standards used in the Database Development (See **Supplementary Figure S12** for general structure)

| R2b  | R7    | Subclass | Code | Name                          | CAS No.  | Supplier | Concentration (mg/mL) & Injection Volume (μL) |
|------|-------|----------|------|-------------------------------|----------|----------|-----------------------------------------------|
| -O-H | -H    | HPLAD    | 83   | DL-β-Phenyllactic acid        | 828-01-3 | C        | 0.5, 5                                        |
| -O-H | -O-H  | HPLAD    | 84   | DL-p hydroxyphenyllactic acid | 306-23-0 | A        | 2, 5                                          |
| -O-H | -O-Me | HPLAD    | 85   | p-Methoxyphenyllactic acid    | N.I.     | C        | 0.5, 20                                       |
| -H   | -H    | HPPAD    | 86   | 3-Phenyl propionic acid       | 501-52-0 | C        | 1, 5                                          |
| -H   | -O-H  | HPPAD    | 87   | Phloretic acid                | 501-97-3 | C        | 1, 5                                          |

Legend: -H – hydride, -O-H – hydroxide, -O-Me – Methoxide, N.I. – No information, Suppliers: A= Sigma Aldrich (Castle Hill, NSW, Australia), C= Combi-Blocks Inc., (San Diego,CA, USA)

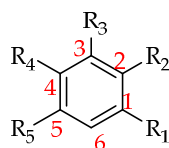

Supplementary Figure S13: Other phenolic compounds (see **88-101** in **Supplementary Table S12**)

Supplementary Table S12: Other/Miscellaneous Phenolic Standards used in the Database Development  
(See **Supplementary Figure S12** for general structure)

| R1        | R2     | R3    | R4     | R5  | Subclass | Code Name                         | CAS No.   | Supplier | Concentration<br>& Injection<br>Volume (μL) |
|-----------|--------|-------|--------|-----|----------|-----------------------------------|-----------|----------|---------------------------------------------|
| -O-H      | -O-Me  | -H    | -vinyl | -H  | AMPh     | <b>88</b> 2-Methoxy-4-vinylphenol | 7786-61-0 | C        | 2 mg/mL, 3                                  |
| -O-H      | -H     | -H    | -O-Me  | -H  | AMPh     | <b>89</b> p-Methoxyphenol         | 150-76-5  | K        | 1.0 mg/mL, 10                               |
| -O-H      | -O-H   | -H    | -H     | -Me | APh      | <b>90</b> 4-Methylpyrocatechol    | 452-86-8  | C        | 1.0 mg/mL, 5                                |
| -O-H      | -H     | -Me   | -Me    | -Me | APh      | <b>91</b> Isopseudocumenol        | 527-54-8  | C        | 0.5 mg/mL, 5                                |
| -O-H      | -Isopr | -H    | -H     | -Me | APh      | <b>92</b> Thymol                  | 89-83-8   | A        | 0.5 mg/mL, 5                                |
| -O-H      | -H     | -H    | -      | -H  | p-AmPh   | <b>93</b> Acetaminophen           | 103-90-2  | H        | 1.0 mg/mL, 5                                |
| -O-H      | -O-H   | -H    | -H     | -H  | Phenol   | <b>94</b> Pyrocatechol            | 120-80-9  | G        | 1.0 mg/mL, 5                                |
| -O-H      | -O-H   | -O-H  | -H     | -H  | Phenol   | <b>95</b> Pyrogallol              | 87-66-1   | K        | 1.0 % v/v, 5                                |
| -C(=O)H   | -Me    | -H    | -H     | -H  | HBzd     | <b>96</b> 2-Methylbenzaldehyde    | 529-20-4  | C        | 1.0 % v/v, 5                                |
| -C(=O)H   | -H     | -H    | -O-Me  | -H  | HBzd     | <b>97</b> p-Anisaldehyde          | 123-11-5  | L        | 0.5 mg/mL, 5                                |
| -C(=O)H   | -H     | -O-H  | -O-H   | -H  | HBzd     | <b>98</b> Protocatechualdehyde    | 139-85-5  | C        | 0.5 mg/mL, 5                                |
| -C(=O)H   | -H     | -O-Me | -O-H   | -H  | HBzd     | <b>99</b> Vanillin                | 121-33-5  | H        | 0.5mg/mL, 3                                 |
| -ethanone | -O-H   | -H    | -H     | -H  | HAPhn    | <b>100</b> 2'-Hydroxyacetophenone | 118-93-4  | A        | 0.5 mg/mL, 5                                |
| -ethanone | -O-Me  | -H    | -H     | -H  | HAPhn    | <b>101</b> 2'-Methoxyacetophenone | 579-74-8  | A        | 2.0 mg/mL, 3                                |

Legend: -H – hydride, -O-H – hydroxide, -O-Me – Methoxide, -Isopr – isopropyl, -C(=O) H – aldehyde group, Subclass: AMPh – alkylmethoxyphenol, APh – alkylphenol, HBzd – hydroxybenzaldehyde, HAPhn – hydroxyacetophenone, Suppliers: A= Sigma Aldrich (Castle Hill, NSW, Australia), C= Combi-Blocks Inc., (San Diego,CA, USA), G= Chem Supply Australia Pty Ltd (Port Adelaide, SA, Australia), H= Sigma-Aldrich (St. Louis, MO, USA), K=Fluka AG (Buchs, Sankt Gallen, Switzerland), L= Acros Organics (Carlsbad, CA, USA)

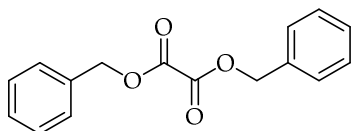

Supplementary Figure S14: Dibenzyl oxalate (see **102** in **Supplementary Table S13**)

Supplementary Table S13: Oxalate ester Standard used in the Database Development (See **Supplementary Figure S14** for structure)

| Code       | Name             | CAS No.   | Supplier | Concentration<br>(mg/mL) and Injection<br>Volume (μL) |
|------------|------------------|-----------|----------|-------------------------------------------------------|
| <b>102</b> | Dibenzyl oxalate | 7579-36-4 | C        | 1.0, 10                                               |

Supplier: C= Combi-Blocks Inc., (San Diego,CA, USA)



Supplementary Figure S15: Structure of the non-phenolic compounds (see **103-107** in **Supplementary Table S14**)

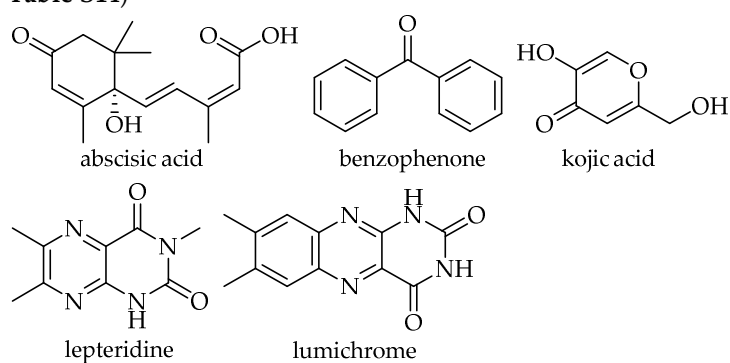

Supplementary Table S14: Non-phenolic compounds used in the Database Development (See **Supplementary Figure S15** for structures)

| Subclass     | Name           | Code       | CAS No.    | Supplier | Concentration (mg/mL) |
|--------------|----------------|------------|------------|----------|-----------------------|
|              |                |            |            |          | Volume (μL)           |
| Non Phenolic | Absciscic acid | <b>103</b> | 21293-29-8 | A        | 0.5, 5                |
| Non Phenolic | Benzophenone   | <b>104</b> | 119-61-9   | G        | 0.5, 20               |
| Non Phenolic | Kojic acid     | <b>105</b> | 501-30-4   | A        | 0.5, 5                |
| Non Phenolic | Lepetridine    | <b>106</b> | N.I.       | J        | 0.5, 5                |
| Non Phenolic | Lumichrome     | <b>107</b> | 1086-80-2  | A        | 0.5, 5                |

Legend: N.I. – no information, Suppliers: A=Sigma Aldrich (Castle Hill, NSW, Australia), G=Chem Supply Australia Pty Ltd (Port Adelaide, SA, Australia), J=Kindly donated by Dr Jonathan Stephens (Auckland University, New Zealand)

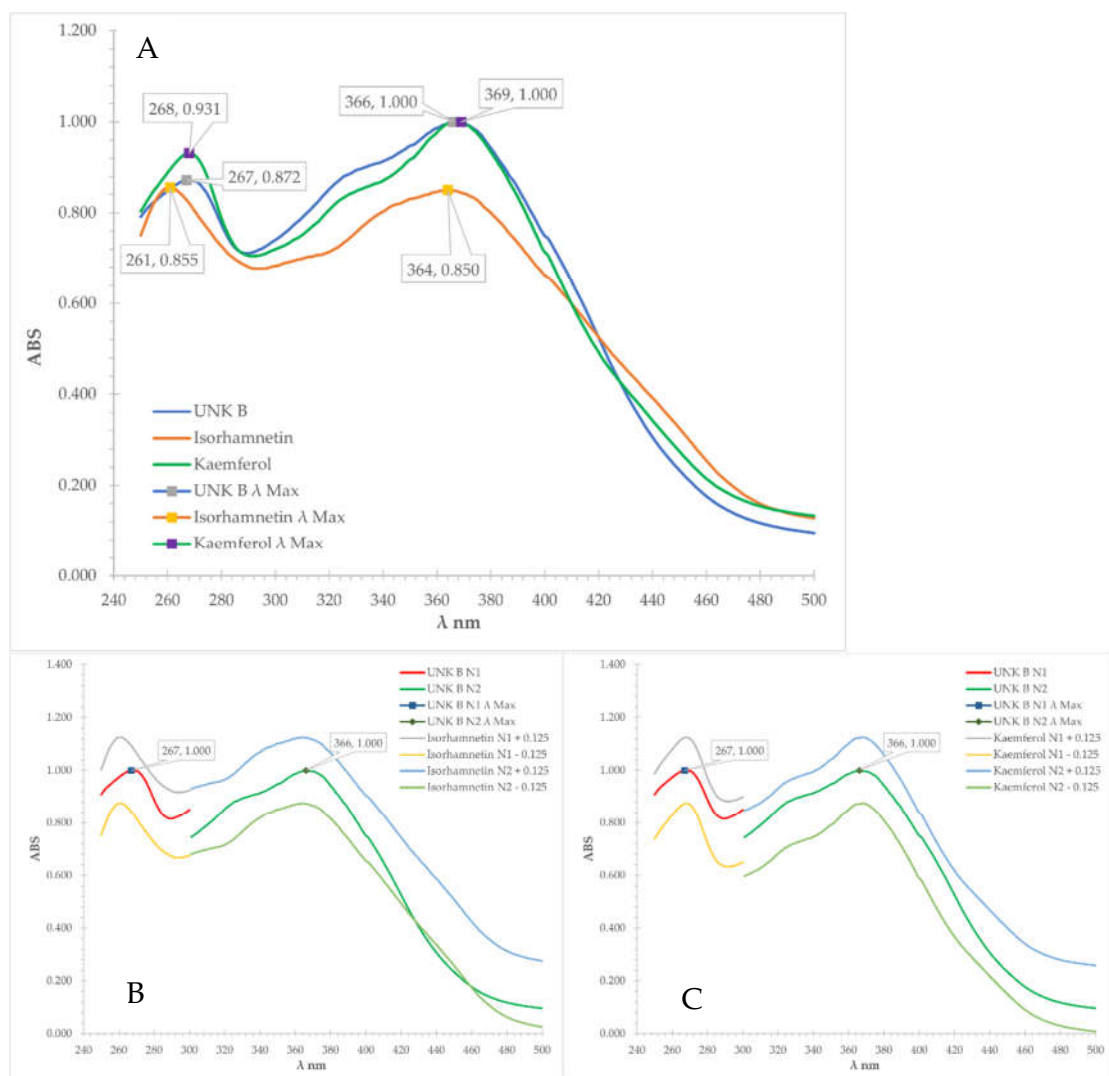

Supplementary Figure S16 A-C. UV-Vis spectra (prior to derivatisation) overlay of unknown B vs isorhamnetin and kaempferol (A) and UV-Vis (prior to derivatisation) spectra overlay of unknown A vs the  $\pm 0.125$  AU of isorhamnetin (B) and vs  $\pm 0.125$  AU of kaempferol (C)

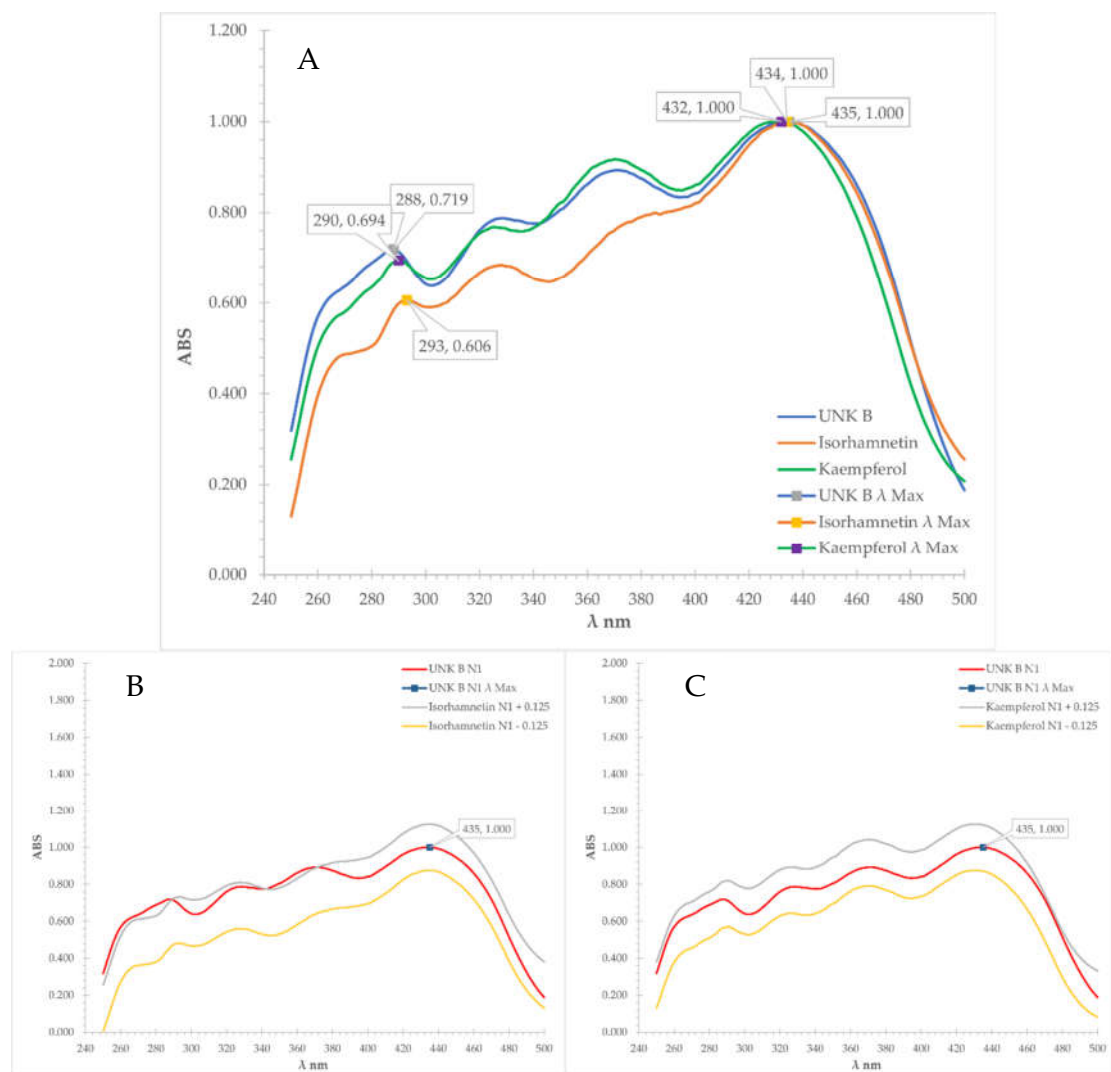

Supplementary Figure S17 A-C. UV-Vis spectra (after derivatisation with NP-PEG reagent) overlay of unknown B vs isorhamnetin and kaempferol (A) and UV-Vis (after derivatisation with NP-PEG reagent) spectra overlay of unknown A vs the  $\pm 0.125$  AU of isorhamnetin (B) and vs  $\pm 0.125$  AU of kaempferol (C)

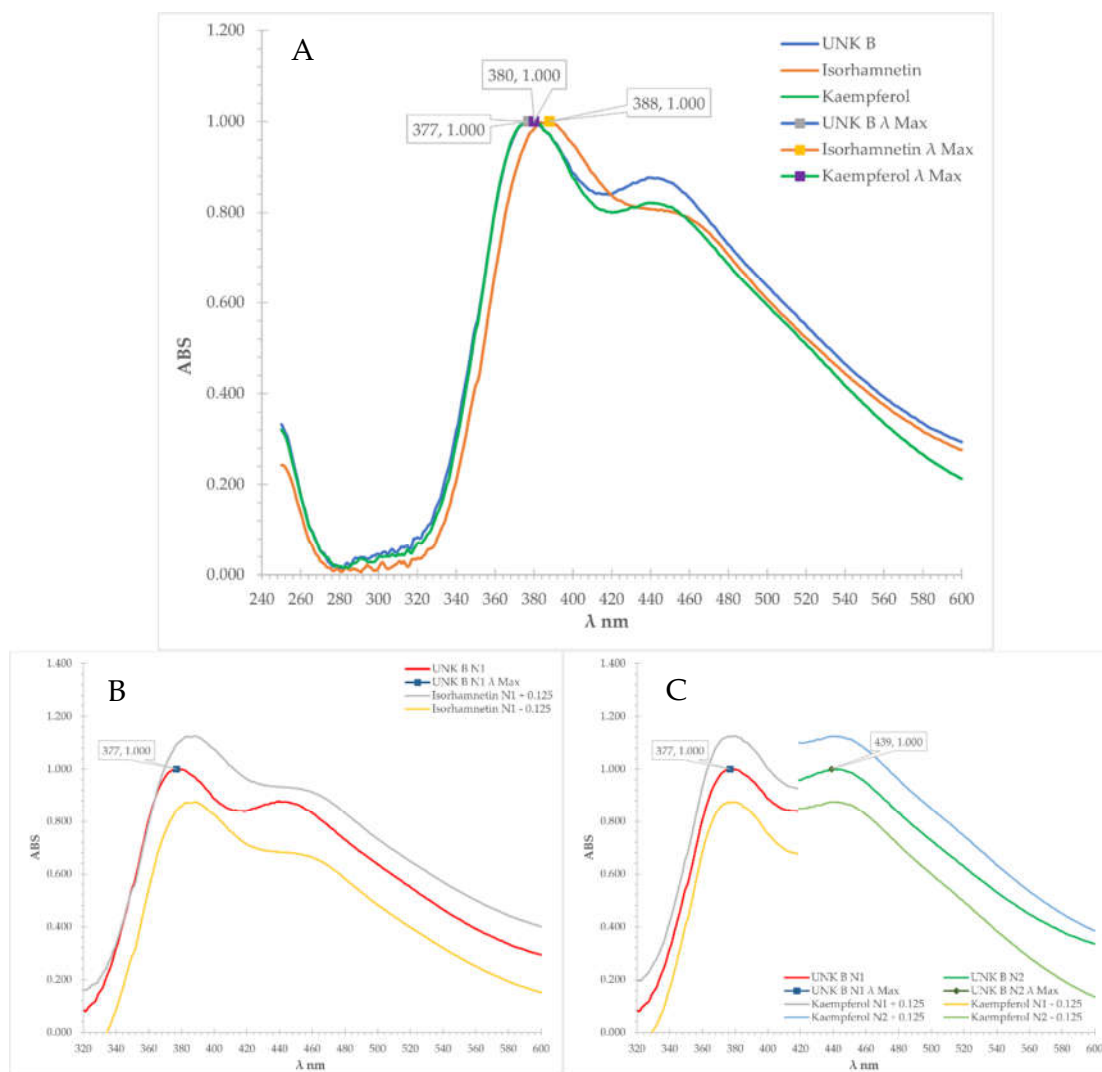

Supplementary Figure S18 A-C. UV-Vis spectra (after derivatised with VSA reagent) overlay of unknown B vs isorhamnetin and kaempferol (A) and UV-Vis (after derivatised with VSA reagent) spectra overlay of unknown A vs the  $\pm 0.125$  AU of isorhamnetin (B) and vs  $\pm 0.125$  AU of kaempferol (C)

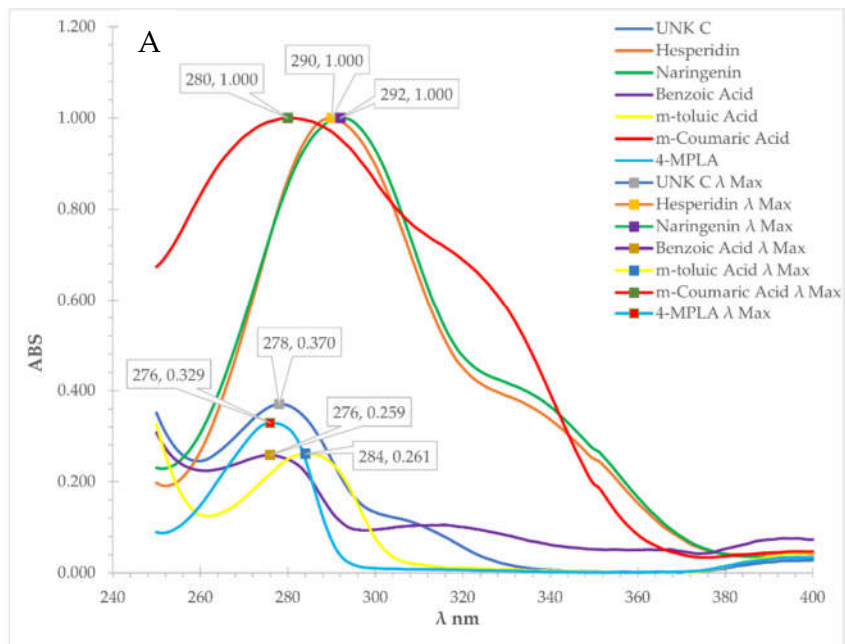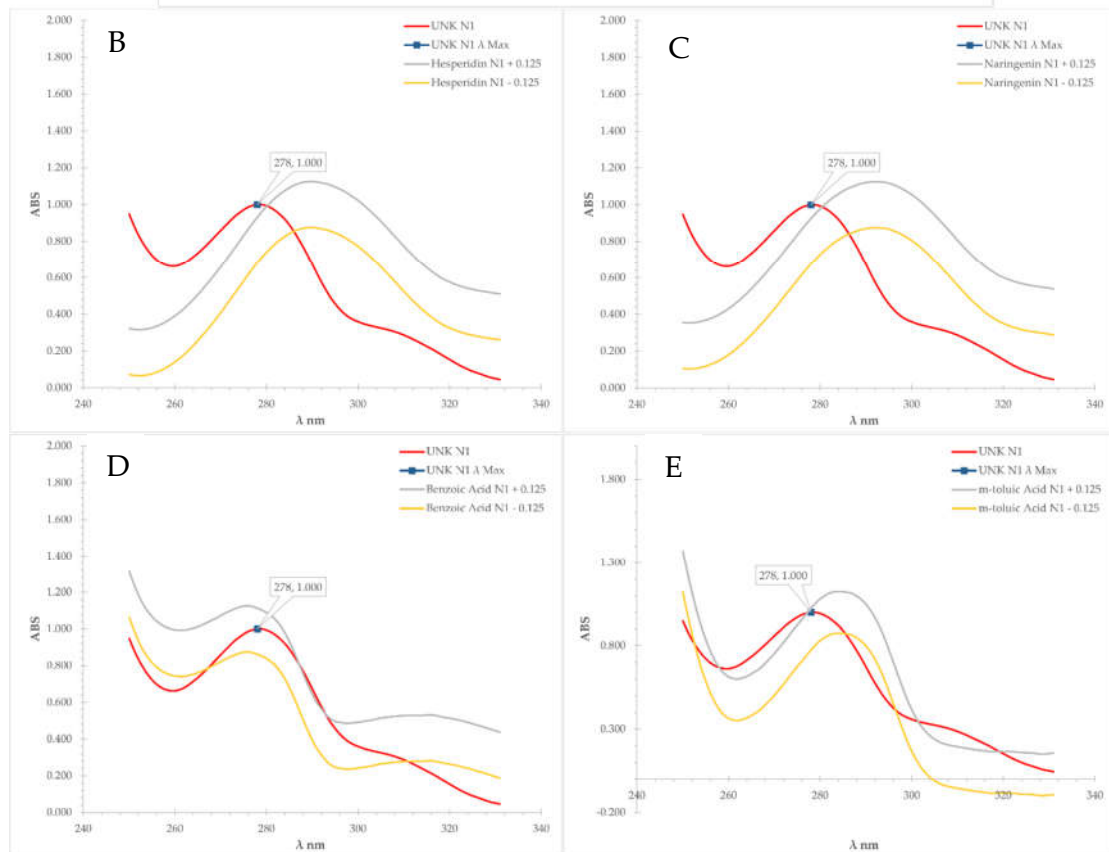

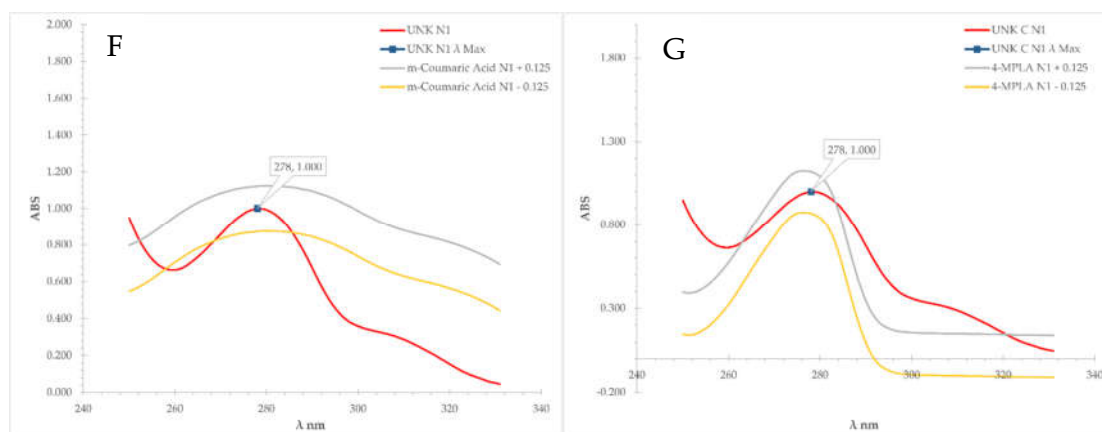

Supplementary Figure S19 A-G. UV-Vis spectra (prior to derivatisation) overlay of unknown C vs the match compounds and UV-Vis (prior to derivatisation) spectra overlay of unknown A vs the  $\pm 0.125$  AU of hesperitin (B), vs  $\pm 0.125$  AU of naringenin (C), vs  $\pm 0.125$  AU of benzoic acid (D),  $\pm 0.125$  AU of m-toluic acid (E),  $\pm 0.125$  AU of m-coumaric acid (F), and  $\pm 0.125$  AU of p-MPLA (G)

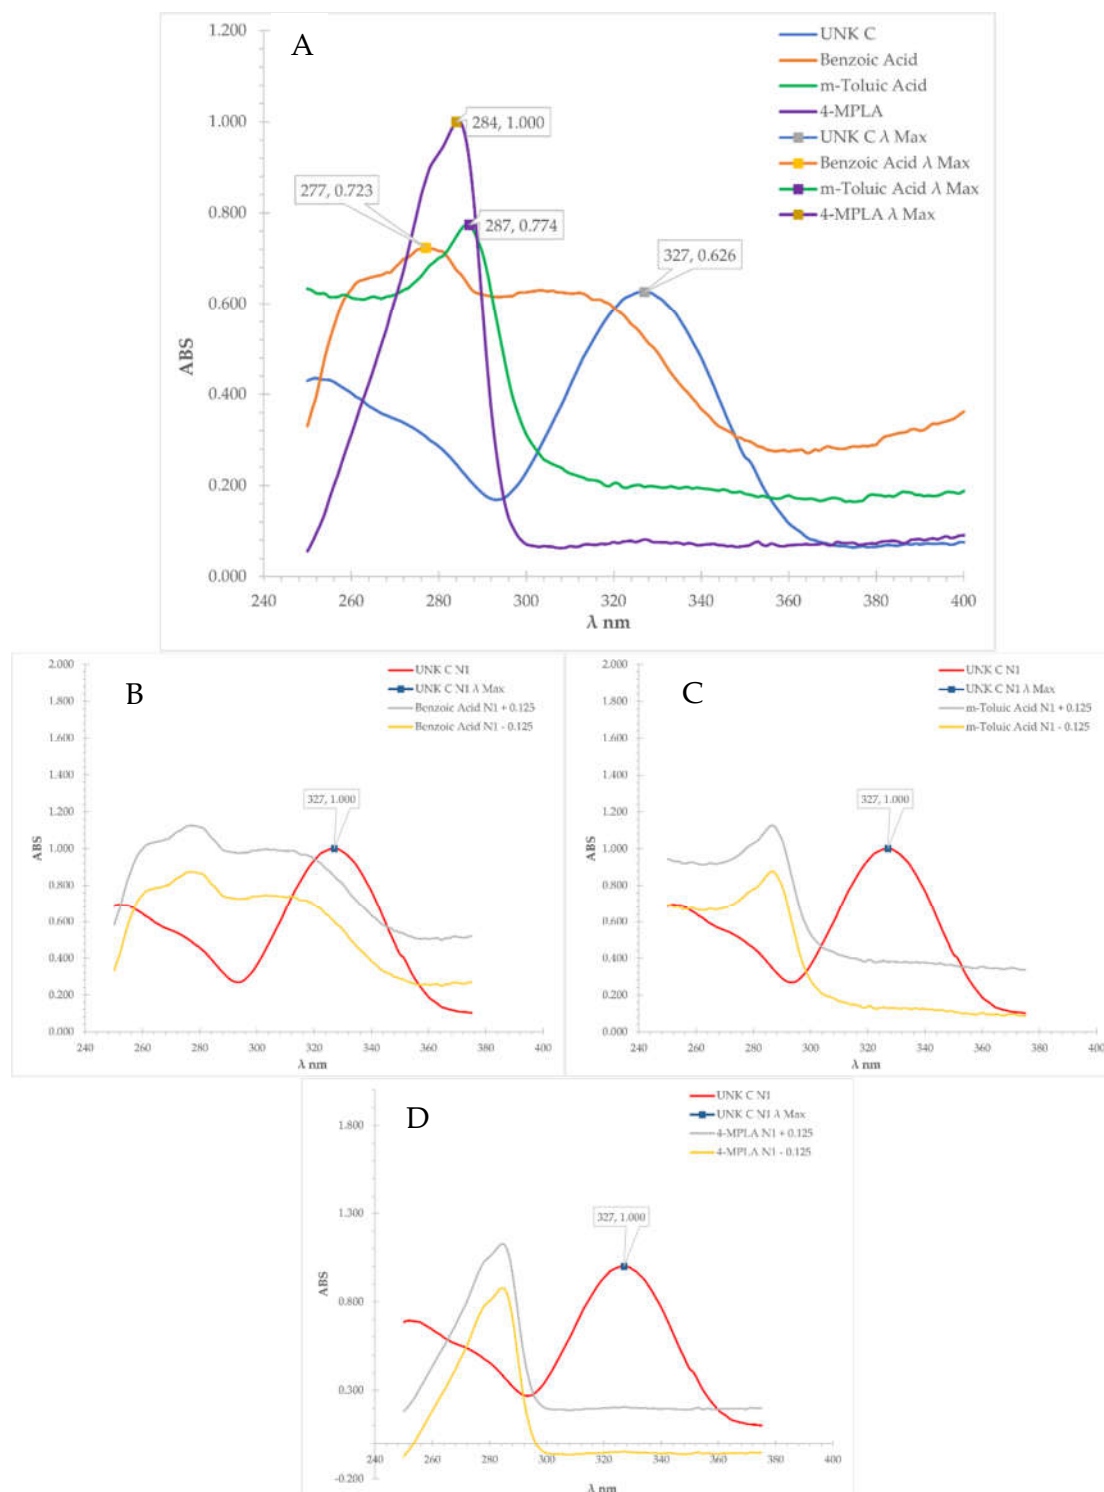

Supplementary Figure S20 A-D. UV-Vis spectra (after derivatisation with NP-PEG reagent) overlay of unknown C vs benzoic acid (B), m-toluic acid (C), and 4-MPLA (D) and UV-Vis (after development) spectra overlay of unknown A vs the  $\pm 0.125$  AU of benzoic acid (B),  $\pm 0.125$  AU of m-toluic acid (C), and  $\pm 0.125$  AU of p-MPLA (D)

Supplementary Table S15. Summary of the data used to determine the identity of the unknown bands in Manuka honey (Database 1A)

| Name and Code | Rf 1  | H° DEV 254 nm | H° DEV 366 nm | H° NP 366 nm | Fl DEV $\lambda$ | Fl DEV $\lambda$ m | UV DEV $\lambda_1$ | UV DEV $\lambda_2$ | UV DEV $\lambda_3$ | Fl NP $\lambda$ | UV NP $\lambda_1$ |
|---------------|-------|---------------|---------------|--------------|------------------|--------------------|--------------------|--------------------|--------------------|-----------------|-------------------|
| LS            | 0.02  | 140           | 196           | 195          | 223              | 257                | 267                | 0                  | 0                  | 238             | 319               |
| LS            | 0.077 | 141           | 200           | 195          | 222              | 259                | 283                | 0                  | 0                  | 252             | 327               |
| LS            | 0.134 | 141           | 181           | 201          | 225              | 262                | 260                | 0                  | 0                  | 250             | 327               |
| LS            | 0.199 | 140           | 194           | 191          | 223              | 240                | 282                | 0                  | 0                  | 250             | 324               |
| LS            | 0.244 | 140           | 192           | 195          | 224              | 259                | 288                | 0                  | 0                  | 251             | 327               |
| LS            | 0.319 | 143           | 187           | 197          | 224              | 255                | 328                | 0                  | 0                  | 251             | 331               |
| LS            | 0.392 | 139           | 196           | 195          | 222              | 253                | 282                | 0                  | 0                  | 246             | 328               |
| LS            | 0.467 | 142           | 192           | 196          | 219              | 261                | 264                | 358                | 0                  | 250             | 318               |
| LS            | 0.513 | 140           | 197           | 199          | 222              | 233                | 276                | 0                  | 0                  | 248             | 316               |
| LS            | 0.543 | 141           | 195           | 196          | 226              | 233                | 277                | 0                  | 0                  | 248             | 319               |
| LS            | 0.635 | 140           | 206           | 200          | 229              | 260                | 275                | 0                  | 0                  | 246             | 292               |
| LS            | 0.685 | 141           | 204           | 198          | 225              | 256                | 261                | 0                  | 0                  | 249             | 324               |

Legend: **Rf1** – retention factor in MPA, **H° DEV 254 nm** – hue equivalent at 254 nm prior to derivatisation, **H° DEV 366 nm** – hue equivalent at 366 nm prior to derivatisation, **H° NP 366 nm** – hue equivalent at 366 nm after derivatisation w/ NP-PEG derivatisation reagent, **Fl DEV  $\lambda$** – fluorescence  $\lambda$  max prior to derivatisation, **Fl DEV  $\lambda$  m** – fluorescence  $\lambda$  min prior to derivatisation, **UV DEV  $\lambda_{1-3}$** – UV-Vis  $\lambda$  max prior to derivatisation, **Fl NP  $\lambda$** – fluorescence  $\lambda$  max after derivatisation with NP-PEG reagent, **UV NP  $\lambda_{1-3}$** – UV-Vis  $\lambda$  max after derivatisation with NP-PEG reagent



Supplementary Table S16. Summary of the data used to determine the identity of the unknown bands in Manuka honey (Database 1B)

| Name and Code | Rf 1  | H° DEV 254 nm | H° DEV 366 nm | H° VSA 366 nm | H° T VSA | FI DEV λ | FI DEV λ m | UV DEV λ <sub>1</sub> | UV DEV λ <sub>2</sub> | UV DEV λ <sub>3</sub> | FI VS λ | UV VS λ |
|---------------|-------|---------------|---------------|---------------|----------|----------|------------|-----------------------|-----------------------|-----------------------|---------|---------|
| LS            | 0.02  | 140           | 196           | 203           | 23       | 223      | 257        | 267                   | 0                     | 0                     | 249     | 447     |
| LS            | 0.077 | 141           | 200           | 200           | 23       | 222      | 259        | 283                   | 0                     | 0                     | 249     | 372     |
| LS            | 0.134 | 141           | 181           | 199           | 23       | 225      | 262        | 272                   | 0                     | 0                     | 249     | 378     |
| LS            | 0.199 | 140           | 194           | 201           | 26       | 223      | 240        | 282                   | 0                     | 0                     | 249     | 439     |
| LS            | 0.244 | 140           | 192           | 199           | 19       | 224      | 259        | 288                   | 0                     | 0                     | 248     | 367     |
| LS            | 0.319 | 143           | 187           | 201           | 17       | 224      | 255        | 328                   | 0                     | 0                     | 248     | 365     |
| LS            | 0.392 | 139           | 196           | 203           | 10       | 222      | 253        | 282                   | 0                     | 0                     | 248     | 369     |
| LS            | 0.467 | 142           | 192           | 202           | 29       | 219      | 261        | 264                   | 358                   | 0                     | 249     | 368     |
| LS            | 0.513 | 140           | 197           | 205           | 21       | 222      | 233        | 281                   | 0                     | 0                     | 248     | 368     |
| LS            | 0.543 | 141           | 195           | 206           | 9        | 226      | 233        | 277                   | 0                     | 0                     | 249     | 367     |
| LS            | 0.635 | 140           | 201           | 203           | 14       | 229      | 260        | 275                   | 0                     | 0                     | 248     | 368     |
| LS            | 0.685 | 141           | 205           | 202           | 21       | 225      | 256        | 261                   | 0                     | 0                     | 249     | 368     |

Legend: **Rf1** – retention factor in MPA, **H° DEV 254 nm** – hue and colour equivalent at 254 nm prior to derivatisation, **H° DEV 366 nm** – hue and colour equivalent at 366 nm prior to derivatisation, **H° VS 366 nm** – hue and colour equivalent at 366 nm after derivatisation w/ VSA derivatisation reagent, **H° T VS** – hue and colour equivalent at transmittance in white light after derivatisation w/ VSA derivatisation reagent; **FI DEV λ max**– fluorescence λ max prior to derivatisation, **FI DEV λ m**– fluorescence λ min prior to derivatisation, **UV DEV λ<sub>1-3</sub>**– UV-Vis λ max prior to derivatisation, **FI VS λ**– fluorescence λ max after derivatisation with VSA reagent, **UV VS λ**– UV-Vis λ max after derivatisation with VSA reagent

Supplementary Table S17. Summary of the data used to determine the identity of the unknown bands in Manuka honey (Database 2A)

| Name and Code | Rf 2  | H° DEV 254 nm | H° DEV 366 nm | H° NP 366 nm | Fl DEV $\lambda_1$ | Fl DEV $m_1$ | UV DEV $\lambda_1$ | UV DEV $\lambda_2$ | UV DEV $\lambda_3$ | Fl NP $\lambda_1$ | UV NP $\lambda_1$ |
|---------------|-------|---------------|---------------|--------------|--------------------|--------------|--------------------|--------------------|--------------------|-------------------|-------------------|
| LS            | 0.021 | 144           | 200           | 196          | 224                | 258          | 285                | 0                  | 0                  | 246               | 309               |
| LS            | 0.081 | 140           | 170           | 188          | 221                | 261          | 276                | 0                  | 0                  | 250               | 322               |
| LS            | 0.100 | 140           | 194           | 198          | 211                | 259          | 281                | 0                  | 0                  | 246               | 315               |
| LS            | 0.121 | 140           | 193           | 200          | 211                | 259          | 295                | 0                  | 0                  | 245               | 315               |
| LS            | 0.150 | 140           | 196           | 199          | 223                | 261          | 281                | 0                  | 0                  | 248               | 314               |
| LS            | 0.220 | 143           | 187           | 194          | 226                | 254          | 326                | 0                  | 0                  | 243               | 322               |
| LS            | 0.247 | 140           | 194           | 199          | 221                | 254          | 250                | 334                | 0                  | 246               | 325               |
| LS            | 0.310 | 142           | 190           | 200          | 216                | 258          | 284                | 0                  | 0                  | 246               | 313               |
| LS            | 0.349 | 139           | 197           | 197          | 223                | 233          | 277                | 0                  | 0                  | 247               | 315               |
| LS            | 0.425 | 142           | 193           | 171          | 224                | 257          | 261                | 0                  | 0                  | 246               | 315               |
| LS            | 0.470 | 141           | 203           | 201          | 224                | 244          | 296                | 0                  | 0                  | 246               | 294               |
| LS            | 0.510 | 140           | 205           | 201          | 236                | 260          | 276                | 0                  | 0                  | 243               | 291               |
| LS            | 0.550 | 141           | 192           | 200          | 224                | 259          | 276                | 0                  | 0                  | 246               | 291               |
| LS            | 0.603 | 140           | 205           | 206          | 227                | 253          | 303                | 0                  | 0                  | 246               | 322               |

Legend: **Rf2** – retention factor in MPB, **H° DEV 254 nm** – hue equivalent at 254 nm prior to derivatisation, **H° DEV 366 nm** – hue equivalent at 366 nm prior to derivatisation, **H° NP 366 nm** – hue equivalent at 366 nm after derivatisation w/ NP-PEG derivatisation reagent, **Fl DEV  $\lambda$** – fluorescence  $\lambda$  max prior to derivatisation, **Fl DEV  $\lambda m$**  – fluorescence  $\lambda$  min prior to derivatisation, **UV DEV  $\lambda_{1-3}$** – UV-Vis  $\lambda$  max prior to derivatisation, **Fl NP  $\lambda$** – fluorescence  $\lambda$  max after derivatisation with NP-PEG reagent, **UV NP  $\lambda_{1-3}$** – UV-Vis  $\lambda$  max after derivatisation with NP-PEG reagent

Supplementary Table S18. Summary of the data used to determine the identity of the unknown bands in Manuka honey (Database 2B)

| Name and Code | Rf 2  | H° DEV 254 nm | H° DEV 366 nm | H° VSA 366 nm | H° T VSA | Fl DEV $\lambda_1$ | Fl DEV $\lambda_1$ | UV DEV $\lambda_1$ | UV DEV $\lambda_2$ | UV DEV $\lambda_3$ | Fl VS $\lambda_2$ | UV VS $\lambda_1$ |
|---------------|-------|---------------|---------------|---------------|----------|--------------------|--------------------|--------------------|--------------------|--------------------|-------------------|-------------------|
| LS            | 0.021 | 144           | 200           | 201           | 21       | 224                | 260                | 285                | 0                  | 0                  | 251               | 439               |
| LS            | 0.081 | 140           | 170           | 205           | 24       | 221                | 261                | 276                | 0                  | 0                  | 252               | 435               |
| LS            | 0.1   | 140           | 194           | 204           | 18       | 211                | 259                | 281                | 0                  | 0                  | 252               | 372               |
| LS            | 0.121 | 140           | 193           | 200           | 17       | 211                | 259                | 266                | 0                  | 0                  | 247               | 451               |
| LS            | 0.15  | 140           | 196           | 204           | 16       | 225                | 257                | 281                | 0                  | 0                  | 250               | 473               |
| LS            | 0.22  | 143           | 187           | 205           | 4        | 226                | 254                | 326                | 0                  | 0                  | 248               | 368               |
| LS            | 0.247 | 140           | 194           | 205           | 7        | 218                | 252                | 250                | 334                | 0                  | 248               | 477               |
| LS            | 0.31  | 142           | 190           | 200           | 28       | 215                | 261                | 284                | 0                  | 0                  | 247               | 445               |
| LS            | 0.349 | 139           | 197           | 207           | 7        | 223                | 233                | 277                | 0                  | 0                  | 251               | 451               |
| LS            | 0.425 | 142           | 193           | 206           | 60       | 224                | 256                | 261                | 0                  | 0                  | 250               | 451               |
| LS            | 0.47  | 141           | 203           | 202           | 12       | 224                | 243                | 296                | 0                  | 0                  | 248               | 481               |
| LS            | 0.51  | 140           | 205           | 204           | 6        | 236                | 260                | 276                | 0                  | 0                  | 248               | 367               |
| LS            | 0.55  | 141           | 192           | 202           | 13       | 224                | 259                | 276                | 0                  | 0                  | 248               | 361               |
| LS            | 0.603 | 140           | 205           | 206           | 23       | 227                | 253                | 303                | 0                  | 0                  | 248               | 370               |

Legend: **Rf2** – retention factor in MPB, **H° DEV 254 nm** – hue and colour equivalent at 254 nm prior to derivatisation, **H° DEV 366 nm** – hue and colour equivalent at 366 nm prior to derivatisation, **H° VSA 366 nm** – hue and colour equivalent at 366 nm after derivatisation w/ VSA derivatisation reagent, **H° T VSA** – hue and colour equivalent at transmittance in white light after derivatisation w/ VSA derivatisation reagent; **Fl DEV  $\lambda$  max**– fluorescence  $\lambda$  max prior to derivatisation, **Fl DEV  $\lambda$  m**– fluorescence  $\lambda$  min prior to derivatisation, **UV DEV  $\lambda_{1-3}$** – UV-Vis  $\lambda$  max prior to derivatisation, **Fl VS  $\lambda$** – fluorescence  $\lambda$  max after derivatisation with VSA reagent, **UV VS  $\lambda$** – UV-Vis  $\lambda$  max after derivatisation with VSA reagent
